# Supplementary material for: Complementary ligands direct the formation of a calix[8]arene-supported ferromagnetic MnIVMnIII dimer
Source: Royal Society of Chemistry journal article supplement (doi:10.1039/c3dt50294e), 2013-01-01
Supplement: c3dt50294e.pdf [file c3dt50294e.pdf]

## Supporting Information for Manuscript: Complementary ligands direct the formation of a calix[8]arene-supported ferromagnetic Mn<sup>IV</sup>Mn<sup>III</sup> dimer

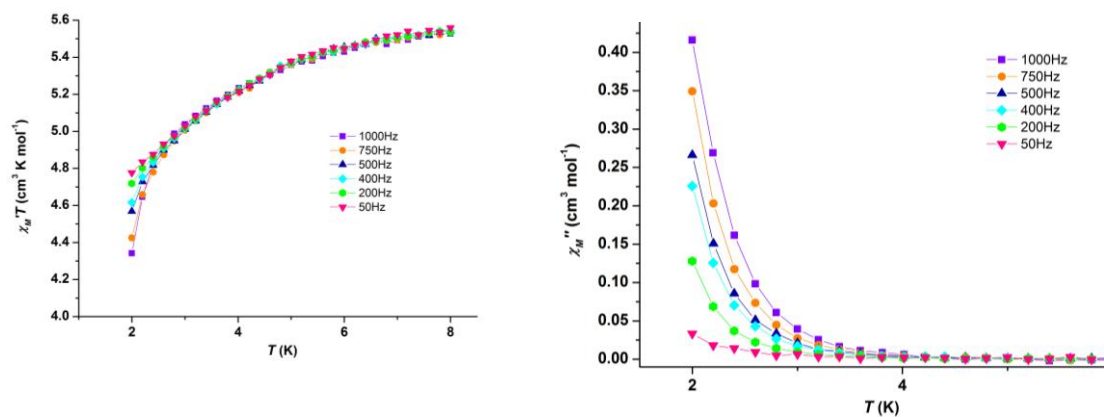

**Figure S1.** AC magnetisation measurements carried out on **1** in the 1.8 – 10 K range in a 3.5 G ac field oscillating at frequencies up to 1000 Hz. The in-phase measurement is plotted on the left hand side and the out-of-phase measurement on the right hand side.

Additional figure relating to the extended structure of **1**.

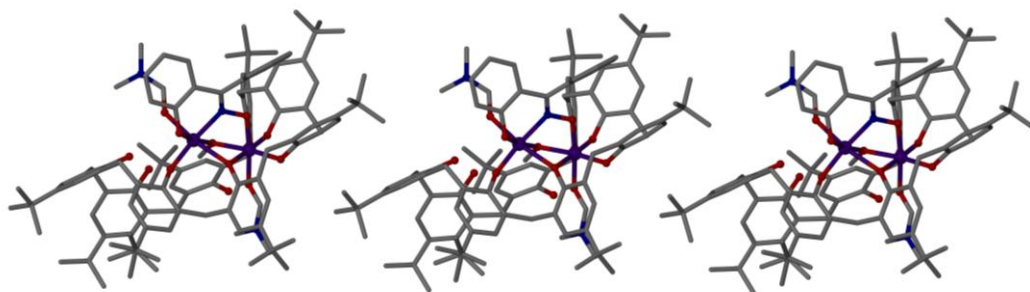

**Figure S2.** Extended structure of **1** showing linear chains formed by CH...p interactions. Hydrogen atoms and co-crystallised solvent molecules omitted for clarity. Colour code: C – grey, N – dark blue, O – red, Mn – purple.
